# Supplementary material
Source: publisher site journal article supplement (https://www.dovepress.com/article/395246)
Supplement: Supplementary file 1 [file get_supplementary_file.php]

ORIGINAL RESEARCH

# Angiopep-2 modified exosomes load rifampicin with potential for treating central nervous system tuberculosis

Han Li1*, Yinan Ding2*, Jiayan Huang1, Yanyan Zhao1, Wei Chen3, Qiusha Tang2, Yanli An4, Rong Chen5, Chunmei Hu1

1Department of tuberculosis, the Second Hospital of Nanjing, Nanjing University of Chinese Medicine, Nanjing, China.

2 Medical School of Southeast University, Nanjing, China.

3 Department of Clinical Research Center, The Second Hospital of Nanjing, Nanjing University of Chinese Medicine, Nanjing, China.

4 Jiangsu Key Laboratory of Molecular and Functional Imaging, Department of Radiology, Zhongda Hospital, Medical School of Southeast University, 87 Dingjiaqiao Road, Nanjing, China

5 Department of Oncology, Zhongda Hospital, Southeast University, Nanjing, Jiangsu, China

*Han Li and Yinan Ding contributed equally in this work

Correspondence: Chunmei Hu

Department of tuberculosis, the Second Hospital of Nanjing, Nanjing University of Chinese Medicine, Nanjing 210009, China.

Email [njyy003@njucm.edu.cn](mailto:njyy003@njucm.edu.cn)


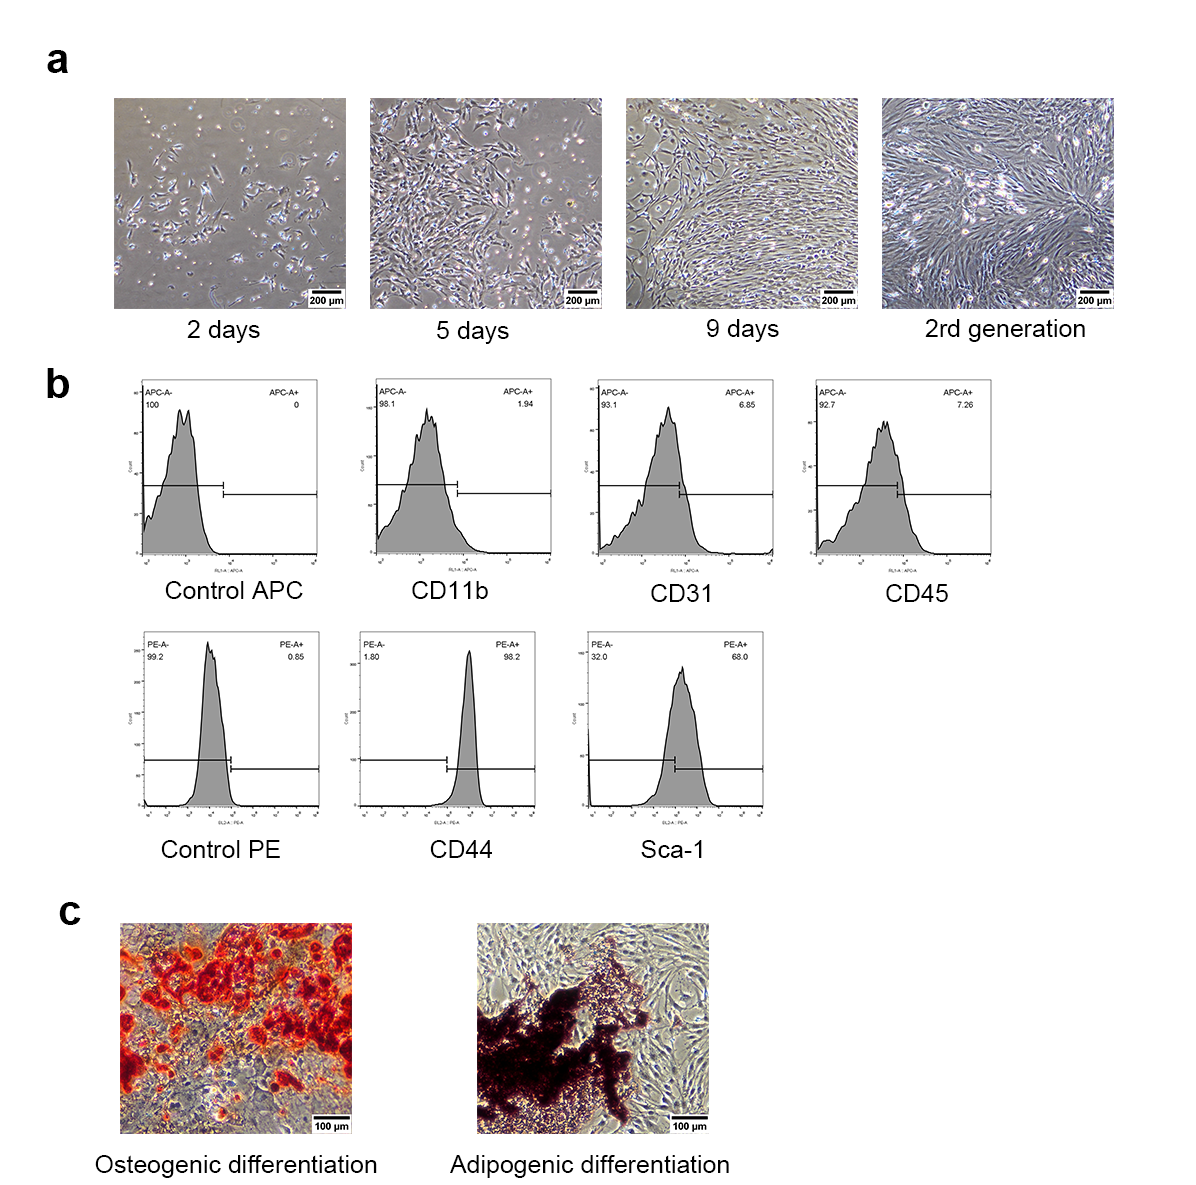


**Figure S1.** Identification of BMSCs. a. The morphology of BMSCs at 2days, 5days, 9days and the second generation after extracted were observed by microscopy. b. The markers of BMSCs were identified by flow cytometry. BMSCs were positive for Sca-1 and CD44 and negative for CD11b, CD31, CD45. c. Adipogenic and osteogenic differentiation of BMSCs. Osteogenic differentiation was indicated by the deposition of mineralized matrix, stained by alizarin red. Adipogenic differentiation was indicated by the formation of lipid droplets, stained by oil red.


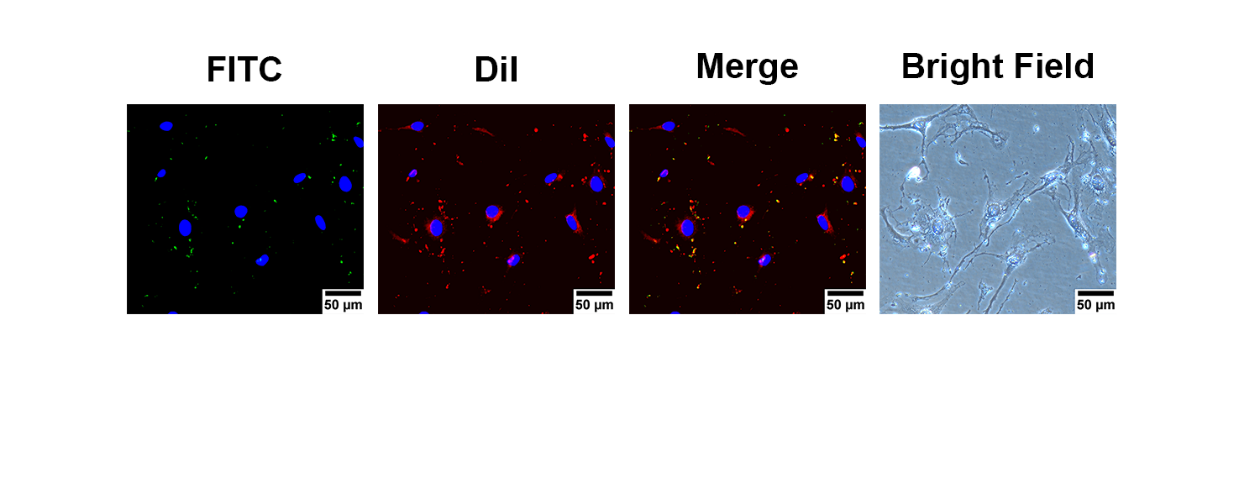


**Figure S2.** ANG-Exo-RIF observed by fluorescent microscopy. The green fluorescence represents FITC carried on the ANG, the red fluorescence represents DiI labeled Exos and the blue fluorescence represents DAPI which is used to stain the nucleus of cells. Merged fluorescence is shown in yellow indicated colocalization.


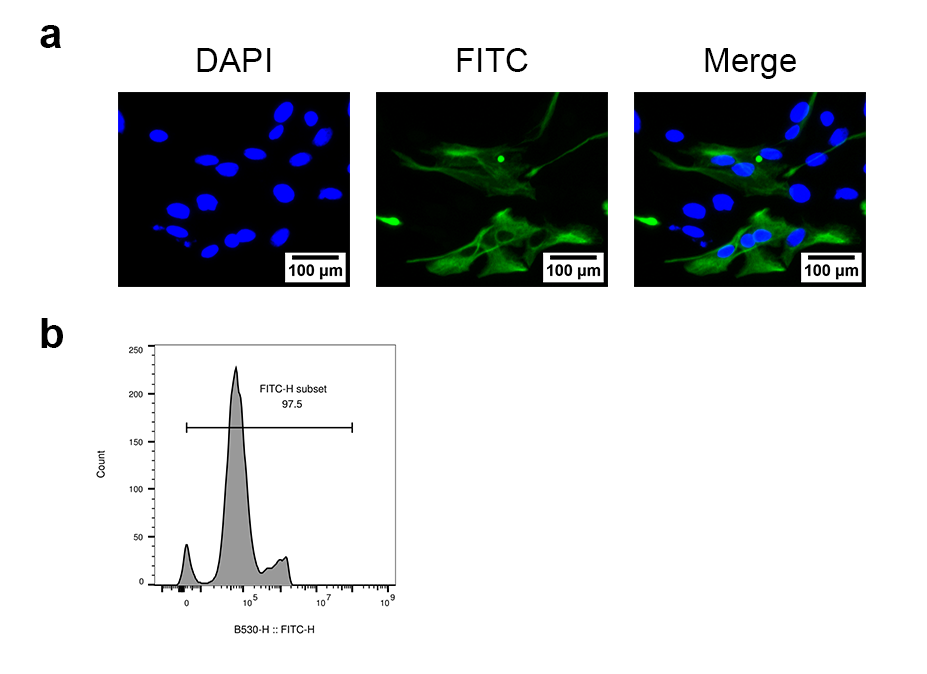


**Figure S3.** The identification of primary astrocyte. a. The blue represents DAPI that stained astrocyte nucleus. The green represents GFAP conjugated FITC. B. The purity of astrocytes was assessed by flow cytometry.


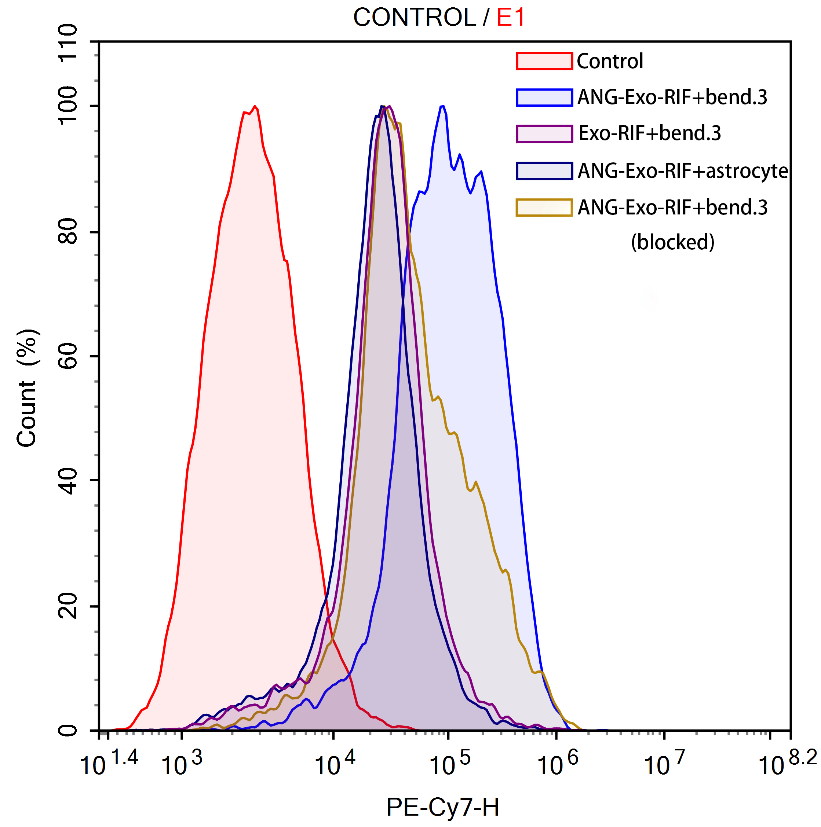


**Figure S4.** The fluorescence signal between targeted and nontargeted exosomes by flow cytometry. Flow cytometric analysis of DiI positive bend.3 cells.


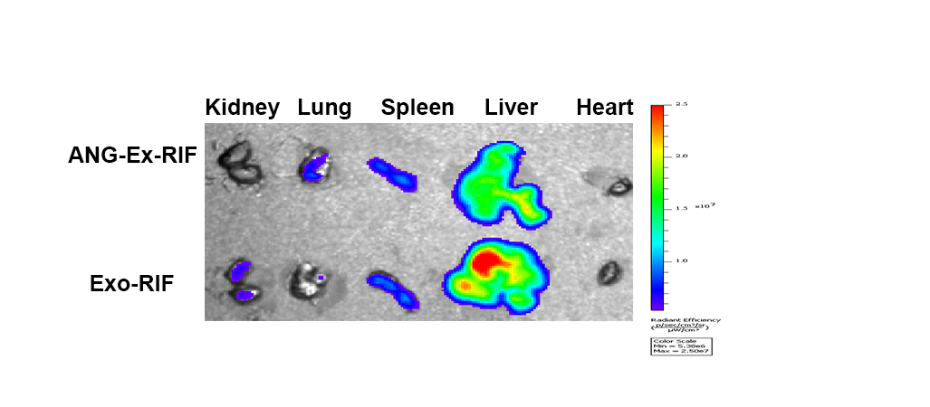


**Figure S5**. Fluorescence images of Ex vivo organs in different group at 24h after injection. Fluorescence represents DiI-labeled exosomes.


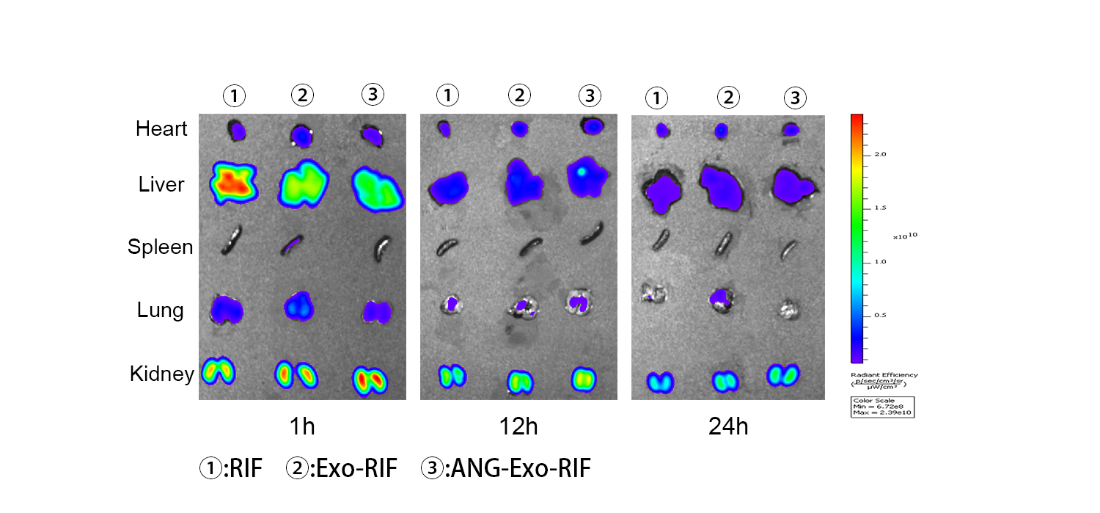


**Figure S6.** Fluorescence images of Ex vivo organs in different group at 1h, 12h, 24h after injection. Fluorescence represents Cy7-RIF.

**Table S1** AST, CK, Scr levels in serum of mice in each group

| Group | AST Testing results (U/L) | Reference ranges (U/L) | CK Testing results (U/L) | Reference ranges (U/L) | Scr Testing results (μmol/L) | Reference ranges (μmol/L) |
| --- | --- | --- | --- | --- | --- | --- |
| PBS | 209.69±13.33 | 36.31-235.48 | 588.90±23.42 | 0-2070.55 | 22.51±2.30 | 10.91-85.09 |
| ANG-Exo-RIF | 195.97±5.23 |  | 698.44±16.43 |  | 25.98±2.31 |  |
| ANG-Exo | 201.33±8.57 |  | 968.31±32.92 |  | 21.65±1.43 |  |
| RIF | 230.52±20.17 |  | 970.11±36.40 |  | 23.79±1.55 |  |
